# Supplementary material for: Which is the most effective pristine graphene electrode for energy storage devices: aerogel or xerogel?
Source: Royal Society of Chemistry journal article supplement (doi:10.1039/c9nr06898h), 2019-01-01
Supplement: c9nr06898h1.pdf [file c9nr06898h1.pdf]

## Supplementary Information

# What is the effective pristine graphene electrode for energy storage devices: aerogel or xerogel?

*Sung Mi Jung<sup>1</sup>, Dong Won Kim<sup>2</sup> and Hyun Young Jung<sup>2,\*</sup>*

<sup>1</sup>Environmental Fate & Exposure Research Group, Korea Institute of Toxicology, Jinju-si, Gyeongnam 52834, South Korea, <sup>2</sup>Department of Energy Engineering, Gyeongnam National University of Science and Technology, Jinju-si, Gyeongnam 52725, South Korea.

\* To whom correspondence should be addressed. E-mail: [hyjung@gntech.ac.kr](mailto:hyjung@gntech.ac.kr)

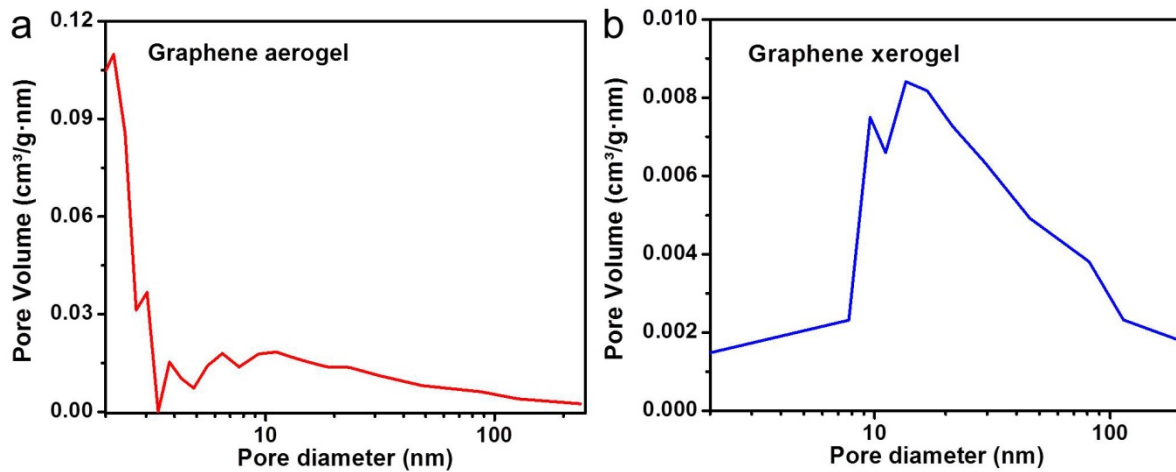

**Figure S1.** Pore size distribution of the graphene aerogels (a)<sup>[1]</sup> and xerogels (b). Most of the pore size of the aerogels is less than 10nm, while that of the xerogels is between 10 nm to 100 nm.

## Reference

- [1] S. M. Jung, D. L. Mafra, C.-T. Lin, H. Y. Jung, J. Kong, *Nanoscale*. **2015**, 7, 4386.
